# Supplementary material for: Molecularly Imprinted Quartz Crystal Microbalance Sensor (QCM) for Bilirubin Detection
Source: Preprints.org preprint supplement (doi:10.20944/preprints201611.0021.v1), 2016-11-02
Supplement: Supplementary file 1 [file supplementary]

Supplementary Materials: Molecularly Imprinted Quartz Crystal Microbalance Sensor (QCM) for Bilirubin Detection

Çiğdem Çiçek, Fatma Yilmaz, Erdoğan Özgür, Handan YavuzAnd Adil Denizli

|  |
| --- |
| (**a**) |
|  |
| (**b**) |

**Figure S1.**

**Figure S2.** The contact angle values of (**a**) unmodified (bare) QCM; (**b**) MIP-QCM; and (**c**) NIP-QCM surfaces.

| 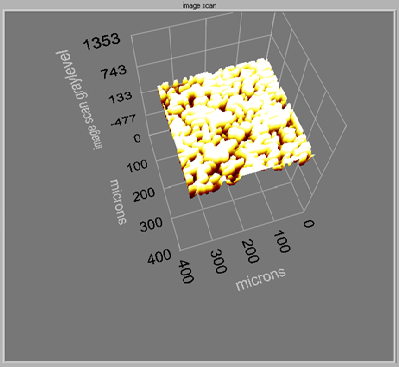  (A) | 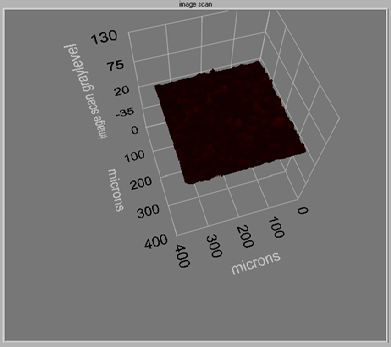  (B) |
| --- | --- |

**Figure S3.** Morphology of QCM sensor surfaces observed with ellipsometer: (**A**) MIP-QCM; (**B**) NIP-QCM.

**Figure S4.** Reproducibility of QCM sensor response for different sensor batch produced at different times; concentration of bilirubin: 1µg/mL; buffer; pH:11 carbonate buffer.
